# Supplementary material for: Single-sided NMR for the measurement of the degree of cross-linking and curing
Source: Copernicus journal article supplement (doi:10.5194/jsss-7-21-2018), 2018-01-24
Supplement: Supplementary file 1 [file jsss-7-21-2018-supplement.zip]

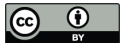

## *Supplement of*

# **Single-sided NMR for the measurement of the degree of cross-linking and curing**

**Norbert Halmen et al.**

*Correspondence to:* Norbert Halmen (n.halmen@skz.de)

- jsss-7-21-2018-supplement-title-page.pdf
- DEA
  - DUOPOXAD840
    - \* DELO-DUOPOX AD840\_23°C.ngb-dea
    - \* Delo DuoPOX AD840\_80°C.ngb-dea
- DSC
  - DUOPOXAD840
    - \* DELO DUOPOX AD840 1.ngb-sd7
    - \* DELO DUOPOX AD840 10.ngb-sd7
    - \* DELO DUOPOX AD840 2.ngb-sd7
    - \* DELO DUOPOX AD840 3.ngb-sd7
    - \* DELO DUOPOX AD840 4.ngb-sd7
    - \* DELO DUOPOX AD840 5.ngb-sd7
    - \* DELO DUOPOX AD840 6.ngb-sd7
    - \* DELO DUOPOX AD840 7.ngb-sd7
    - \* DELO DUOPOX AD840 8.ngb-sd7
    - \* DELO DUOPOX AD840 9.ngb-sd7
  - Epoxy
    - \* DSC 200°C\_10K.ngb-sd7
    - \* DSC 220°C\_10K\_24h.ngb-sd7
    - \* DSC 220°C\_10K\_2h.ngb-sd7
    - \* DSC 220°C\_10K\_4h.ngb-sd7
    - \* DSC 220°C\_10K\_6h.ngb-sd7
    - \* EP-Harz\_220\_17,5h.ngb-sd7
    - \* EP-Harz\_220\_19,5h.ngb-sd7
    - \* EP-Harz\_220\_21,5h.ngb-sd7

- \* EP-Harz\_220\_23,5h.ngb-sd7
- \* EP-Harz\_220\_25,5h.ngb-sd7
- \* EP-Harz\_220\_27,5h.ngb-sd7
- \* EP-Harz\_220øC\_0h.ngb-sd7

– PE-X

- \* PE-Xa\_001#A.ngb-sd7
- \* PE-Xa\_001#B.ngb-sd7
- \* PE-Xa\_003#A.ngb-sd7
- \* PE-Xa\_003#B.ngb-sd7
- \* PE-Xa\_006#A.ngb-sd7
- \* PE-Xa\_006#B.ngb-sd7
- \* PE-Xa\_007#A.ngb-sd7
- \* PE-Xa\_007#B.ngb-sd7
- \* PE-Xa\_009#A.ngb-sd7
- \* PE-Xa\_009#B.ngb-sd7
- \* PE-Xa\_011#A.ngb-sd7
- \* PE-Xa\_011#B.ngb-sd7
- \* PE-Xa\_012#A.ngb-sd7
- \* PE-Xa\_012#B.ngb-sd7
- \* PE-Xa\_015#A.ngb-sd7
- \* PE-Xa\_015#B.ngb-sd7
- \* PE-Xa\_021#A.ngb-sd7
- \* PE-Xa\_021#B.ngb-sd7
- \* PE-Xa\_023#A.ngb-sd7
- \* PE-Xa\_023#B.ngb-sd7
- \* PE-Xc\_0kGy#A.ngb-sd7
- \* PE-Xc\_0kGy#B.ngb-sd7
- \* PE-Xc\_100kGy#A.ngb-sd7
- \* PE-Xc\_100kGy#B.ngb-sd7
- \* PE-Xc\_120kGy#A.ngb-sd7
- \* PE-Xc\_120kGy#B.ngb-sd7
- \* PE-Xc\_140kGy#A.ngb-sd7
- \* PE-Xc\_140kGy#B.ngb-sd7
- \* PE-Xc\_160kGy#A.ngb-sd7
- \* PE-Xc\_160kGy#B.ngb-sd7
- \* PE-Xc\_180kGy#A.ngb-sd7
- \* PE-Xc\_180kGy#B.ngb-sd7
- \* PE-Xc\_20kGy#A.ngb-sd7
- \* PE-Xc\_20kGy#B.ngb-sd7
- \* PE-Xc\_40kGy#A.ngb-sd7
- \* PE-Xc\_40kGy#B.ngb-sd7
- \* PE-Xc\_60kGy#A.ngb-sd7
- \* PE-Xc\_60kGy#B.ngb-sd7
- \* PE-Xc\_80kGy#A.ngb-sd7
- \* PE-Xc\_80kGy#B.ngb-sd7
- \* PEX-C\_0kGy#A.ngb-sd7
- \* PEX-C\_0kGy#B.ngb-sd7

- NMR
  - NMR EP UP AD840.opj
  - NMR PE-Xa.opj
  - NMR PE-Xc.opj

The copyright of individual parts of the supplement might differ from the CC BY 4.0 License.
